# Supplementary material for: Disentangling heterogeneity in Substance Use Disorders: Insights from Genome-Wide Polygenic Scores
Source: bioRxiv or medRxiv preprint supplement (doi:10.1101/2023.11.11.23298413), 2023-11-12
Supplement: Supplementary file [file media-1.pdf]

**Supplementary Table 1.**

*Discovery GWASs of psychiatric diseases, behavioral and related traits used to construct the GPSs*

| <b>Trait</b>                             | <b>n cases</b> | <b>n controls</b> | <b>n total <sup>a</sup></b> | <b>ref</b>                                                                          |
|------------------------------------------|----------------|-------------------|-----------------------------|-------------------------------------------------------------------------------------|
| Attention-Deficit Hyperactivity Disorder | 20,183         | 35,191            | 51,306                      | [1]                                                                                 |
| Anxiety                                  | 16,730         | 101,021           | 57,412                      | <a href="http://www.nealelab.is/uk-biobank/">http://www.nealelab.is/uk-biobank/</a> |
| Bipolar Disorder                         | 41,917         | 371,549           | 150,670                     | [2]                                                                                 |
| Depression                               | 170,756        | 329,443           | 449,856                     | [3]                                                                                 |
| Post-Traumatic Stress Disorder           | 9,354          | 25,175            | 27,280                      | [4]                                                                                 |
| Schizophrenia                            | 67390          | 94015             | 157,013                     | [5]                                                                                 |
| Risk tolerance                           | -              | -                 | 466,571                     | [6]                                                                                 |
| Suicide attempt                          | 26,590         | 492,022           | 100,907                     | [7]                                                                                 |
| Educational attainment                   | -              | -                 | 766,345                     | [8]                                                                                 |
| Well being                               | -              | -                 | 2,083,151                   | [9]                                                                                 |

<sup>a</sup> For binary traits effective sample size was calculated with the formula  $4/(1/n \text{ cases} + 1/n \text{ controls})$

**Supplementary Table 2a.** Association between the GPS for ADHD and 39 clinical variables from the SUD phenome. In bold nominal significant results.

| Phenotypes                                                | <i>n</i> <sup>a</sup> | Regression        | Estimate <sup>b</sup> | 95% CI            | <i>p</i>        |
|-----------------------------------------------------------|-----------------------|-------------------|-----------------------|-------------------|-----------------|
| <b>SUD-related phenotypes</b>                             |                       |                   |                       |                   |                 |
| Age at onset of substance use <sup>c</sup>                | 1308                  | Linear            | -0,01                 | -0,03 , -3,00E-04 | <b>4,53E-02</b> |
| Age at onset of SUD <sup>c</sup>                          | 1280                  | Linear            | -0,01                 | -0,02 , 0,01      | 0,39            |
| Years between substance use and SUD                       | 1280                  | Linear            | 1,04                  | 0,95 , 1,14       | 0,36            |
| Years of substance use as proportion of lifespan          | 1199                  | Linear            | 1,07                  | 0,03 , 2,1        | <b>4,42E-02</b> |
| Number of substances consumed                             | 879                   | Negative binomial | 1,03                  | 0,99 , 1,07       | 0,19            |
| Number of therapeutic community interventions             | 1345                  | Negative binomial | 1,01                  | 0,92 , 1,11       | 0,80            |
| Number of inpatient detoxifications                       | 1327                  | Negative binomial | 1,03                  | 0,92 , 1,15       | 0,62            |
| Number of outpatient treatments                           | 1252                  | Negative binomial | 1,05                  | 0,99 , 1,11       | 0,09            |
| <b>Comorbidity and personality traits</b>                 |                       |                   |                       |                   |                 |
| <i>Mental disorders in DSM-IV</i>                         |                       |                   |                       |                   |                 |
| Borderline personality disorder                           | 447                   | Logistic          | 1,12                  | 0,92 , 1,36       | 0,28            |
| Major depressive disorder                                 | 828                   | Logistic          | 1,10                  | 0,96 , 1,27       | 0,17            |
| Antisocial personality disorder                           | 560                   | Logistic          | 1,24                  | 1,04 , 1,47       | <b>1,60E-02</b> |
| Psychotic disorder                                        | 593                   | Logistic          | 1,02                  | 0,79 , 1,3        | 0,90            |
| Anxiety disorder                                          | 654                   | Logistic          | 1,03                  | 0,88 , 1,2        | 0,71            |
| Attention deficit hyperactivity disorder                  | 700                   | Logistic          | 1,24                  | 1,06 , 1,45       | <b>7,35E-03</b> |
| <i>Zuckerman–Kuhlman Personality Questionnaire (ZKPQ)</i> |                       |                   |                       |                   |                 |
| Neuroticism Anxiety personality factor                    | 663                   | Linear            | 0,07                  | -0,29 , 0,43      | 0,72            |
| Aggression Hostility personality factor                   | 667                   | Linear            | 0,15                  | -0,08 , 0,38      | 0,21            |
| Sociability personality factor                            | 632                   | Linear            | -0,18                 | -0,44 , 0,08      | 0,18            |
| Impulsive sensation seeking personality factor            | 666                   | Linear            | 0,01                  | -0,3 , 0,32       | 0,94            |
| Activity personality factor                               | 665                   | Linear            | 0,02                  | -0,24 , 0,28      | 0,88            |
| Suicide attempt                                           | 618                   | Logistic          | 1,03                  | 0,89 , 1,19       | 0,67            |
| Suicide ideation                                          | 731                   | Logistic          | 0,98                  | 0,84 , 1,15       | 0,80            |
| Psychotic symptoms                                        | 1281                  | Logistic          | 1,00                  | 0,89 , 1,12       | 0,98            |
| Sleeping disturbances                                     | 1228                  | Logistic          | 1,02                  | 0,91 , 1,14       | 0,76            |

## Sociodemographic and health phenotypes

### *EuropASI*

|                                          |      |                   |       |              |                 |
|------------------------------------------|------|-------------------|-------|--------------|-----------------|
| Legal status                             | 984  | Ordinal           | 1,00  | 0,87 , 1,16  | 0,97            |
| Employment status                        | 984  | Ordinal           | 1,08  | 0,97 , 1,2   | 0,18            |
| Medical status                           | 982  | Ordinal           | 1,03  | 0,92 , 1,17  | 0,60            |
| Psychiatric status                       | 984  | Ordinal           | 1,01  | 0,91 , 1,13  | 0,86            |
| Drug use                                 | 984  | Ordinal           | 1,06  | 0,95 , 1,19  | 0,28            |
| Alcohol use                              | 984  | Ordinal           | 0,96  | 0,86 , 1,08  | 0,54            |
| Family/Social relationships              | 981  | Ordinal           | 1,10  | 0,99 , 1,23  | 0,09            |
| <i>36-Item Short Form Survey (SF-36)</i> |      |                   |       |              |                 |
| Physical health                          | 751  | Linear            | -0,52 | -1,23 , 0,19 | 0,15            |
| Mental health                            | 751  | Linear            | 0,49  | -0,45 , 1,44 | 0,31            |
| Criminal record                          | 713  | Logistic          | 1,13  | 0,98 , 1,32  | 0,10            |
| Unemployment                             | 1057 | Logistic          | 1,03  | 0,91 , 1,17  | 0,61            |
| Number of psychiatric hospitalizations   | 760  | Negative binomial | 1,05  | 0,86 , 1,29  | 0,61            |
| Psychiatric family history               | 840  | Logistic          | 0,97  | 0,85 , 1,11  | 0,66            |
| Lifetime medical conditions              | 1334 | Logistic          | 0,99  | 0,88 , 1,11  | 0,84            |
| Substance use family history             | 818  | Logistic          | 1,10  | 0,96 , 1,27  | 0,16            |
| Educational attainment                   | 1333 | Ordinal           | 0,85  | 0,93 , 0,77  | <b>1,20E-03</b> |

<sup>a</sup> For binary traits sample size was calculated with the formula  $4/(1/n1+1/n2)$

<sup>b</sup> OR is reported for logistic regression and ordinal regression; Beta is reported for lineal regression; IRR is reported for negative binomial regression

<sup>c</sup> Logarithmic transformations were applied to continuous variables not following a normal distribution

**Supplementary Table 2b.** Association between the GPS for anxiety and 39 clinical variables from the SUD phenome. In bold nominal significant results.

| Phenotypes                                                | <i>n</i> <sup>a</sup> | Regression        | Estimate <sup>b</sup> | 95% CI       | <i>p</i>        |
|-----------------------------------------------------------|-----------------------|-------------------|-----------------------|--------------|-----------------|
| <b>SUD-related phenotypes</b>                             |                       |                   |                       |              |                 |
| Age at onset of substance use <sup>c</sup>                | 1308                  | Linear            | -0,01                 | -0,02 , 0,01 | 0,36            |
| Age at onset of SUD <sup>c</sup>                          | 1280                  | Linear            | 0,00                  | -0,02 , 0,01 | 0,77            |
| Years between substance use and SUD                       | 1280                  | Linear            | 1,04                  | 0,95 , 1,13  | 0,45            |
| Years of substance use as proportion of lifespan          | 1199                  | Linear            | -0,03                 | -1,07 , 1,02 | 0,96            |
| Number of substances consumed                             | 879                   | Negative binomial | 1,01                  | 0,97 , 1,05  | 0,79            |
| Number of therapeutic community interventions             | 1345                  | Negative binomial | 1,10                  | 1 , 1,21     | 0,05            |
| Number of inpatient detoxifications                       | 1327                  | Negative binomial | 1,01                  | 0,9 , 1,13   | 0,84            |
| Number of outpatient treatments                           | 1252                  | Negative binomial | 1,09                  | 1,03 , 1,15  | <b>2,67E-03</b> |
| <b>Comorbidity and personality traits</b>                 |                       |                   |                       |              |                 |
| <i>Mental disorders in DSM-IV</i>                         |                       |                   |                       |              |                 |
| Borderline personality disorder                           | 447                   | Logistic          | 1,02                  | 0,84 , 1,24  | 0,86            |
| Major depressive disorder                                 | 828                   | Logistic          | 1,03                  | 0,9 , 1,19   | 0,63            |
| Antisocial personality disorder                           | 560                   | Logistic          | 1,09                  | 0,92 , 1,29  | 0,30            |
| Psychotic disorder                                        | 593                   | Logistic          | 1,49                  | 1,16 , 1,92  | <b>1,93E-03</b> |
| Anxiety disorder                                          | 654                   | Logistic          | 1,04                  | 0,89 , 1,21  | 0,63            |
| Attention deficit hyperactivity disorder                  | 700                   | Logistic          | 0,86                  | 0,74 , 1,01  | 0,06            |
| <i>Zuckerman–Kuhlman Personality Questionnaire (ZKPQ)</i> |                       |                   |                       |              |                 |
| Neuroticism Anxiety personality factor                    | 663                   | Linear            | 0,23                  | -0,12 , 0,59 | 0,20            |
| Aggression Hostility personality factor                   | 667                   | Linear            | 0,07                  | -0,16 , 0,3  | 0,56            |
| Sociability personality factor                            | 632                   | Linear            | -0,08                 | -0,34 , 0,17 | 0,53            |
| Impulsive sensation seeking personality factor            | 666                   | Linear            | 0,02                  | -0,29 , 0,33 | 0,91            |
| Activity personality factor                               | 665                   | Linear            | 0,04                  | -0,22 , 0,29 | 0,79            |
| Suicide attempt                                           | 618                   | Logistic          | 1,07                  | 0,93 , 1,23  | 0,37            |
| Suicide ideation                                          | 731                   | Logistic          | 1,01                  | 0,87 , 1,18  | 0,88            |
| Psychotic symptoms                                        | 1281                  | Logistic          | 1,06                  | 0,95 , 1,19  | 0,28            |
| Sleeping disturbances                                     | 1228                  | Logistic          | 0,98                  | 0,88 , 1,1   | 0,77            |

## Sociodemographic and health phenotypes

### *EuropASI*

|                                          |      |                   |       |               |                 |
|------------------------------------------|------|-------------------|-------|---------------|-----------------|
| Legal status                             | 984  | Ordinal           | 0,92  | 0,8 , 1,07    | 0,28            |
| Employment status                        | 984  | Ordinal           | 0,97  | 0,87 , 1,08   | 0,57            |
| Medical status                           | 982  | Ordinal           | 1,08  | 0,96 , 1,22   | 0,23            |
| Psychiatric status                       | 984  | Ordinal           | 1,08  | 0,97 , 1,2    | 0,16            |
| Drug use                                 | 984  | Ordinal           | 1,08  | 0,97 , 1,21   | 0,17            |
| Alcohol use                              | 984  | Ordinal           | 0,95  | 0,85 , 1,06   | 0,36            |
| Family/Social relationships              | 981  | Ordinal           | 1,07  | 0,96 , 1,19   | 0,26            |
| <i>36-Item Short Form Survey (SF-36)</i> |      |                   |       |               |                 |
| Physical health                          | 751  | Linear            | -0,93 | -1,64 , -0,22 | <b>1,07E-02</b> |
| Mental health                            | 751  | Linear            | 0,06  | -0,89 , 1,01  | 0,90            |
| Criminal record                          | 713  | Logistic          | 0,94  | 0,81 , 1,1    | 0,47            |
| Unemployment                             | 1057 | Logistic          | 1,05  | 0,93 , 1,19   | 0,44            |
| Number of psychiatric hospitalizations   | 760  | Negative binomial | 1,03  | 0,84 , 1,27   | 0,77            |
| Psychiatric family history               | 840  | Logistic          | 1,16  | 1,01 , 1,33   | <b>4,16E-02</b> |
| Lifetime medical conditions              | 1334 | Logistic          | 1,06  | 0,95 , 1,19   | 0,31            |
| Substance use family history             | 818  | Logistic          | 1,02  | 0,88 , 1,17   | 0,80            |
| Educational attainment                   | 1333 | Ordinal           | 0,92  | 1,02 , 0,83   | 0,10            |

<sup>a</sup> For binary traits sample size was calculated with the formula  $4/(1/n1+1/n2)$

<sup>b</sup> OR is reported for logistic regression and ordinal regression; Beta is reported for lineal regression; IRR is reported for negative binomial regression

<sup>c</sup> Logarithmic transformations were applied to continuous variables not following a normal distribution

**Supplementary Table 2c.** Association between the GPS for bipolar disorder and 39 clinical variables from the SUD phenome. In bold nominal significant results.

| Phenotypes                                                | <i>n</i> <sup>a</sup> | Regression        | Estimate <sup>b</sup> | 95% CI       | <i>p</i>        |
|-----------------------------------------------------------|-----------------------|-------------------|-----------------------|--------------|-----------------|
| <b>SUD-related phenotypes</b>                             |                       |                   |                       |              |                 |
| Age at onset of substance use <sup>c</sup>                | 1308                  | Linear            | 0,01                  | -0,01 , 0,02 | 0,33            |
| Age at onset of SUD <sup>c</sup>                          | 1280                  | Linear            | 0,00                  | -0,02 , 0,02 | 0,90            |
| Years between substance use and SUD                       | 1280                  | Linear            | 1,01                  | 0,93 , 1,11  | 0,78            |
| Years of substance use as proportion of lifespan          | 1199                  | Linear            | 0,20                  | -0,85 , 1,24 | 0,71            |
| Number of substances consumed                             | 879                   | Negative binomial | 1,02                  | 0,98 , 1,07  | 0,26            |
| Number of therapeutic community interventions             | 1345                  | Negative binomial | 0,92                  | 0,84 , 1,01  | 0,09            |
| Number of inpatient detoxifications                       | 1327                  | Negative binomial | 1,03                  | 0,92 , 1,16  | 0,59            |
| Number of outpatient treatments                           | 1252                  | Negative binomial | 0,99                  | 0,94 , 1,05  | 0,85            |
| <b>Comorbidity and personality traits</b>                 |                       |                   |                       |              |                 |
| <i>Mental disorders in DSM-IV</i>                         |                       |                   |                       |              |                 |
| Borderline personality disorder                           | 447                   | Logistic          | 1,03                  | 0,85 , 1,26  | 0,74            |
| Major depressive disorder                                 | 828                   | Logistic          | 0,94                  | 0,81 , 1,08  | 0,37            |
| Antisocial personality disorder                           | 560                   | Logistic          | 1,02                  | 0,86 , 1,21  | 0,85            |
| Psychotic disorder                                        | 593                   | Logistic          | 1,08                  | 0,84 , 1,4   | 0,53            |
| Anxiety disorder                                          | 654                   | Logistic          | 0,98                  | 0,83 , 1,15  | 0,78            |
| Attention deficit hyperactivity disorder                  | 700                   | Logistic          | 1,04                  | 0,89 , 1,22  | 0,59            |
| <i>Zuckerman–Kuhlman Personality Questionnaire (ZKPQ)</i> |                       |                   |                       |              |                 |
| Neuroticism Anxiety personality factor                    | 663                   | Linear            | -0,07                 | -0,45 , 0,3  | 0,71            |
| Aggression Hostility personality factor                   | 667                   | Linear            | 0,05                  | -0,18 , 0,29 | 0,65            |
| Sociability personality factor                            | 632                   | Linear            | 0,16                  | -0,11 , 0,43 | 0,24            |
| Impulsive sensation seeking personality factor            | 666                   | Linear            | 0,05                  | -0,28 , 0,38 | 0,76            |
| Activity personality factor                               | 665                   | Linear            | -0,09                 | -0,36 , 0,18 | 0,53            |
| Suicide attempt                                           | 618                   | Logistic          | 1,04                  | 0,9 , 1,2    | 0,62            |
| Suicide ideation                                          | 731                   | Logistic          | 1,05                  | 0,9 , 1,23   | 0,54            |
| Psychotic symptoms                                        | 1281                  | Logistic          | 1,14                  | 1,02 , 1,28  | <b>2,58E-02</b> |
| Sleeping disturbances                                     | 1228                  | Logistic          | 1,00                  | 0,9 , 1,12   | 0,95            |

## Sociodemographic and health phenotypes

### *EuropASI*

|                                          |      |                   |       |              |                 |
|------------------------------------------|------|-------------------|-------|--------------|-----------------|
| Legal status                             | 984  | Ordinal           | 1,09  | 0,95 , 1,26  | 0,22            |
| Employment status                        | 984  | Ordinal           | 0,98  | 0,88 , 1,09  | 0,73            |
| Medical status                           | 982  | Ordinal           | 1,08  | 0,95 , 1,22  | 0,23            |
| Psychiatric status                       | 984  | Ordinal           | 1,00  | 0,9 , 1,11   | 0,94            |
| Drug use                                 | 984  | Ordinal           | 0,93  | 0,83 , 1,04  | 0,19            |
| Alcohol use                              | 984  | Ordinal           | 1,04  | 0,93 , 1,16  | 0,48            |
| Family/Social relationships              | 981  | Ordinal           | 1,01  | 0,9 , 1,12   | 0,92            |
| <i>36-Item Short Form Survey (SF-36)</i> |      |                   |       |              |                 |
| Physical health                          | 751  | Linear            | -0,62 | -1,36 , 0,12 | 0,10            |
| Mental health                            | 751  | Linear            | 0,32  | -0,67 , 1,31 | 0,53            |
| Criminal record                          | 713  | Logistic          | 1,08  | 0,93 , 1,25  | 0,32            |
| Unemployment                             | 1057 | Logistic          | 1,14  | 1,01 , 1,29  | <b>3,72E-02</b> |
| Number of psychiatric hospitalizations   | 760  | Negative binomial | 1,26  | 1,03 , 1,53  | <b>2,23E-02</b> |
| Psychiatric family history               | 840  | Logistic          | 1,12  | 0,98 , 1,28  | 0,11            |
| Lifetime medical conditions              | 1334 | Logistic          | 0,99  | 0,89 , 1,11  | 0,87            |
| Substance use family history             | 818  | Logistic          | 1,15  | 1 , 1,32     | <b>4,89E-02</b> |
| Educational attainment                   | 1333 | Ordinal           | 0,97  | 1,06 , 0,88  | 0,51            |

<sup>a</sup> For binary traits sample size was calculated with the formula  $4/(1/n1+1/n2)$

<sup>b</sup> OR is reported for logistic regression and ordinal regression; Beta is reported for lineal regression; IRR is reported for negative binomial regression

<sup>c</sup> Logarithmic transformations were applied to continuous variables not following a normal distribution

**Supplementary Table 2d.** Association between the GPS for depression and 39 clinical variables from the SUD phenome. In bold nominal significant results.

| Phenotypes                                                | <i>n</i> <sup>a</sup> | Regression        | Estimate <sup>b</sup> | 95% CI           | <i>p</i>        |
|-----------------------------------------------------------|-----------------------|-------------------|-----------------------|------------------|-----------------|
| <b>SUD-related phenotypes</b>                             |                       |                   |                       |                  |                 |
| Age at onset of substance use <sup>c</sup>                | 1308                  | Linear            | 0,01                  | -0,03 , 2,00E-03 | 0,09            |
| Age at onset of SUD <sup>c</sup>                          | 1280                  | Linear            | 0,00                  | -0,02 , 0,01     | 0,54            |
| Years between substance use and SUD                       | 1280                  | Linear            | 1,01                  | 1,01 , 1,21      | <b>3,49E-02</b> |
| Years of substance use as proportion of lifespan          | 1199                  | Linear            | 0,20                  | -1,24 , 0,86     | 0,72            |
| Number of substances consumed                             | 879                   | Negative binomial | 1,02                  | 0,95 , 1,04      | 0,80            |
| Number of therapeutic community interventions             | 1345                  | Negative binomial | 0,92                  | 0,9 , 1,08       | 0,76            |
| Number of inpatient detoxifications                       | 1327                  | Negative binomial | 1,03                  | 0,91 , 1,15      | 0,69            |
| Number of outpatient treatments                           | 1252                  | Negative binomial | 0,99                  | 1,03 , 1,15      | <b>3,04E-03</b> |
| <b>Comorbidity and personality traits</b>                 |                       |                   |                       |                  |                 |
| <i>Mental disorders in DSM-IV</i>                         |                       |                   |                       |                  |                 |
| Borderline personality disorder                           | 447                   | Logistic          | 1,03                  | 0,93 , 1,38      | 0,22            |
| Major depressive disorder                                 | 828                   | Logistic          | 0,94                  | 0,88 , 1,17      | 0,87            |
| Antisocial personality disorder                           | 560                   | Logistic          | 1,02                  | 0,83 , 1,17      | 0,82            |
| Psychotic disorder                                        | 593                   | Logistic          | 1,08                  | 0,85 , 1,41      | 0,50            |
| Anxiety disorder                                          | 654                   | Logistic          | 0,98                  | 0,88 , 1,2       | 0,73            |
| Attention deficit hyperactivity disorder                  | 700                   | Logistic          | 1,04                  | 0,92 , 1,25      | 0,41            |
| <i>Zuckerman–Kuhlman Personality Questionnaire (ZKPQ)</i> |                       |                   |                       |                  |                 |
| Neuroticism Anxiety personality factor                    | 663                   | Linear            | -0,07                 | 4,00E-03 , 0,72  | <b>4,91E-02</b> |
| Aggression Hostility personality factor                   | 667                   | Linear            | 0,05                  | 0,04 , 0,5       | <b>2,18E-02</b> |
| Sociability personality factor                            | 632                   | Linear            | 0,16                  | -0,41 , 0,11     | 0,25            |
| Impulsive sensation seeking personality factor            | 666                   | Linear            | 0,05                  | -0,22 , 0,41     | 0,56            |
| Activity personality factor                               | 665                   | Linear            | -0,09                 | -0,29 , 0,23     | 0,83            |
| Suicide attempt                                           | 618                   | Logistic          | 1,04                  | 1,02 , 1,37      | <b>3,04E-02</b> |
| Suicide ideation                                          | 731                   | Logistic          | 1,05                  | 0,95 , 1,3       | 0,20            |
| Psychotic symptoms                                        | 1281                  | Logistic          | 1,14                  | 0,98 , 1,23      | 0,12            |
| Sleeping disturbances                                     | 1228                  | Logistic          | 1,00                  | 0,93 , 1,17      | 0,48            |



## Sociodemographic and health phenotypes

### *EuropASI*

|                                          |      |                   |       |              |                 |
|------------------------------------------|------|-------------------|-------|--------------|-----------------|
| Legal status                             | 984  | Ordinal           | 1,09  | 0,87 , 1,16  | 0,92            |
| Employment status                        | 984  | Ordinal           | 0,98  | 0,96 , 1,19  | 0,25            |
| Medical status                           | 982  | Ordinal           | 1,08  | 0,99 , 1,27  | 0,06            |
| Psychiatric status                       | 984  | Ordinal           | 1,00  | 1 , 1,23     | 0,06            |
| Drug use                                 | 984  | Ordinal           | 0,93  | 0,87 , 1,09  | 0,68            |
| Alcohol use                              | 984  | Ordinal           | 1,04  | 0,88 , 1,11  | 0,86            |
| Family/Social relationships              | 981  | Ordinal           | 1,01  | 0,99 , 1,23  | 0,08            |
| <i>36-Item Short Form Survey (SF-36)</i> |      |                   |       |              |                 |
| Physical health                          | 751  | Linear            | -0,62 | -1,35 , 0,09 | 0,09            |
| Mental health                            | 751  | Linear            | 0,32  | -1,09 , 0,84 | 0,80            |
| Criminal record                          | 713  | Logistic          | 1,08  | 1,09 , 1,48  | <b>1,82E-03</b> |
| Unemployment                             | 1057 | Logistic          | 1,14  | 0,92 , 1,17  | 0,58            |
| Number of psychiatric hospitalizations   | 760  | Negative binomial | 1,26  | 0,95 , 1,4   | 0,15            |
| Psychiatric family history               | 840  | Logistic          | 1,12  | 1,01 , 1,32  | <b>3,70E-02</b> |
| Lifetime medical conditions              | 1334 | Logistic          | 0,99  | 0,91 , 1,15  | 0,70            |
| Substance use family history             | 818  | Logistic          | 1,15  | 0,99 , 1,31  | 0,06            |
| Educational attainment                   | 1333 | Ordinal           | 0,97  | 1,09 , 0,88  | 0,69            |

<sup>a</sup> For binary traits sample size was calculated with the formula  $4/(1/n1+1/n2)$

<sup>b</sup> OR is reported for logistic regression and ordinal regression; Beta is reported for lineal regression; IRR is reported for negative binomial regression

<sup>c</sup> Logarithmic transformations were applied to continuous variables not following a normal distribution

**Supplementary Table 2e.** Association between the GPS for post-traumatic stress disorder and 39 clinical variables from the SUD phenome. In bold nominal significant results.

| Phenotypes                                                | <i>n</i> <sup>a</sup> | Regression        | Estimate <sup>b</sup> | 95% CI            | <i>p</i>        |
|-----------------------------------------------------------|-----------------------|-------------------|-----------------------|-------------------|-----------------|
| <b>SUD-related phenotypes</b>                             |                       |                   |                       |                   |                 |
| Age at onset of substance use <sup>c</sup>                | 1308                  | Linear            | -0,01                 | -0,03 , -1,00E-03 | <b>3,72E-02</b> |
| Age at onset of SUD <sup>c</sup>                          | 1280                  | Linear            | -0,01                 | -0,03 , 0,01      | 0,23            |
| Years between substance use and SUD                       | 1280                  | Linear            | 0,98                  | 0,9 , 1,08        | 0,70            |
| Years of substance use as proportion of lifespan          | 1199                  | Linear            | 0,16                  | -0,88 , 1,21      | 0,76            |
| Number of substances consumed                             | 879                   | Negative binomial | 0,99                  | 0,96 , 1,04       | 0,79            |
| Number of therapeutic community interventions             | 1345                  | Negative binomial | 1,01                  | 0,92 , 1,11       | 0,89            |
| Number of inpatient detoxifications                       | 1327                  | Negative binomial | 1,13                  | 1,01 , 1,27       | <b>4,15E-02</b> |
| Number of outpatient treatments                           | 1252                  | Negative binomial | 1,05                  | 1 , 1,11          | 0,08            |
| <b>Comorbidity and personality traits</b>                 |                       |                   |                       |                   |                 |
| <i>Mental disorders in DSM-IV</i>                         |                       |                   |                       |                   |                 |
| Borderline personality disorder                           | 447                   | Logistic          | 1,04                  | 0,85 , 1,27       | 0,69            |
| Major depressive disorder                                 | 828                   | Logistic          | 0,92                  | 0,79 , 1,06       | 0,23            |
| Antisocial personality disorder                           | 560                   | Logistic          | 1,11                  | 0,93 , 1,31       | 0,24            |
| Psychotic disorder                                        | 593                   | Logistic          | 1,00                  | 0,78 , 1,29       | 0,97            |
| Anxiety disorder                                          | 654                   | Logistic          | 0,96                  | 0,82 , 1,13       | 0,63            |
| Attention deficit hyperactivity disorder                  | 700                   | Logistic          | 1,15                  | 0,99 , 1,35       | 0,07            |
| <i>Zuckerman–Kuhlman Personality Questionnaire (ZKPQ)</i> |                       |                   |                       |                   |                 |
| Neuroticism Anxiety personality factor                    | 663                   | Linear            | 0,15                  | -0,22 , 0,52      | 0,43            |
| Aggression Hostility personality factor                   | 667                   | Linear            | 0,19                  | -0,05 , 0,43      | 0,12            |
| Sociability personality factor                            | 632                   | Linear            | -0,16                 | -0,43 , 0,11      | 0,24            |
| Impulsive sensation seeking personality factor            | 666                   | Linear            | -0,09                 | -0,41 , 0,23      | 0,59            |
| Activity personality factor                               | 665                   | Linear            | 0,05                  | -0,22 , 0,32      | 0,73            |
| Suicide attempt                                           | 731                   | Logistic          | 1,04                  | 0,88 , 1,22       | 0,68            |
| Suicide ideation                                          | 618                   | Logistic          | 1,00                  | 0,86 , 1,16       | 0,99            |
| Psychotic symptoms                                        | 1281                  | Logistic          | 1,09                  | 0,97 , 1,22       | 0,15            |
| Sleeping disturbances                                     | 1228                  | Logistic          | 1,08                  | 0,97 , 1,22       | 0,17            |

## Sociodemographic and health phenotypes

### *EuropASI*

|                                          |      |                   |       |              |                 |
|------------------------------------------|------|-------------------|-------|--------------|-----------------|
| Legal status                             | 984  | Ordinal           | 1,00  | 0,86 , 1,15  | 0,96            |
| Employment status                        | 984  | Ordinal           | 1,00  | 0,9 , 1,12   | 0,99            |
| Medical status                           | 982  | Ordinal           | 1,13  | 0,99 , 1,28  | 0,07            |
| Psychiatric status                       | 984  | Ordinal           | 1,00  | 0,9 , 1,12   | 0,99            |
| Drug use                                 | 984  | Ordinal           | 0,96  | 0,86 , 1,08  | 0,50            |
| Alcohol use                              | 984  | Ordinal           | 1,00  | 0,9 , 1,13   | 0,94            |
| Family/Social relationships              | 981  | Ordinal           | 1,06  | 0,95 , 1,19  | 0,28            |
| <i>36-Item Short Form Survey (SF-36)</i> |      |                   |       |              |                 |
| Physical health                          | 751  | Linear            | 0,32  | -0,65 , 1,29 | 0,52            |
| Mental health                            | 751  | Linear            | -0,21 | -0,94 , 0,52 | 0,57            |
| Criminal record                          | 713  | Logistic          | 1,12  | 0,96 , 1,3   | 0,15            |
| Unemployment                             | 1057 | Logistic          | 1,23  | 1,09 , 1,4   | <b>1,00E-03</b> |
| Number of psychiatric hospitalizations   | 760  | Negative binomial | 0,86  | 0,7 , 1,06   | 0,15            |
| Psychiatric family history               | 840  | Logistic          | 1,15  | 1 , 1,32     | 0,05            |
| Lifetime medical conditions              | 1334 | Logistic          | 1,09  | 0,97 , 1,22  | 0,13            |
| Substance use family history             | 818  | Logistic          | 1,12  | 0,97 , 1,29  | 0,11            |
| Educational attainment                   | 1333 | Ordinal           | 0,87  | 0,97 , 0,79  | <b>9,48E-03</b> |

<sup>a</sup> For binary traits sample size was calculated with the formula  $4/(1/n1+1/n2)$

<sup>b</sup> OR is reported for logistic regression and ordinal regression; Beta is reported for lineal regression; IRR is reported for negative binomial regression

<sup>c</sup> Logarithmic transformations were applied to continuous variables not following a normal distribution

**Supplementary Table 2f.** Association between the GPS for schizophrenia and 39 clinical variables from the SUD phenome. In bold nominal significant results.

| Phenotypes                                                | <i>n</i> <sup>a</sup> | Regression        | Estimate <sup>b</sup> | 95% CI          | <i>p</i>        |
|-----------------------------------------------------------|-----------------------|-------------------|-----------------------|-----------------|-----------------|
| <b>SUD-related phenotypes</b>                             |                       |                   |                       |                 |                 |
| Age at onset of substance use <sup>c</sup>                | 1308                  | Linear            | 0,01                  | 3,00E-04 , 0,03 | <b>4,61E-02</b> |
| Age at onset of SUD <sup>c</sup>                          | 1280                  | Linear            | 0,01                  | -0,01 , 0,02    | 0,44            |
| Years between substance use and SUD                       | 1280                  | Linear            | 0,99                  | 0,9 , 1,08      | 0,80            |
| Years of substance use as proportion of lifespan          | 1199                  | Linear            | -0,11                 | -1,15 , 0,94    | 0,84            |
| Number of substances consumed                             | 879                   | Negative binomial | 1,01                  | 0,97 , 1,06     | 0,58            |
| Number of therapeutic community interventions             | 1345                  | Negative binomial | 1,04                  | 0,95 , 1,14     | 0,43            |
| Number of inpatient detoxifications                       | 1327                  | Negative binomial | 1,06                  | 0,95 , 1,19     | 0,28            |
| Number of outpatient treatments                           | 1252                  | Negative binomial | 0,98                  | 0,93 , 1,04     | 0,49            |
| <b>Comorbidity and personality traits</b>                 |                       |                   |                       |                 |                 |
| <i>Mental disorders in DSM-IV</i>                         |                       |                   |                       |                 |                 |
| Borderline personality disorder                           | 447                   | Logistic          | 1,00                  | 0,82 , 1,22     | 0,99            |
| Major depressive disorder                                 | 828                   | Logistic          | 0,93                  | 0,8 , 1,07      | 0,31            |
| Antisocial personality disorder                           | 560                   | Logistic          | 1,04                  | 0,87 , 1,23     | 0,67            |
| Psychotic disorder                                        | 593                   | Logistic          | 1,37                  | 1,05 , 1,78     | <b>1,97E-02</b> |
| Anxiety disorder                                          | 654                   | Logistic          | 0,88                  | 0,75 , 1,03     | 0,12            |
| Attention deficit hyperactivity disorder                  | 700                   | Logistic          | 0,98                  | 0,84 , 1,15     | 0,84            |
| <i>Zuckerman–Kuhlman Personality Questionnaire (ZKPQ)</i> |                       |                   |                       |                 |                 |
| Neuroticism Anxiety personality factor                    | 663                   | Linear            | 0,07                  | -0,3 , 0,44     | 0,71            |
| Aggression Hostility personality factor                   | 667                   | Linear            | 0,18                  | -0,06 , 0,42    | 0,14            |
| Sociability personality factor                            | 632                   | Linear            | 0,01                  | -0,26 , 0,28    | 0,94            |
| Impulsive sensation seeking personality factor            | 666                   | Linear            | -0,17                 | -0,49 , 0,16    | 0,31            |
| Activity personality factor                               | 665                   | Linear            | -0,01                 | -0,27 , 0,26    | 0,97            |
| Suicide attempt                                           | 618                   | Logistic          | 0,90                  | 0,78 , 1,04     | 0,17            |
| Suicide ideation                                          | 731                   | Logistic          | 0,89                  | 0,76 , 1,05     | 0,17            |
| Psychotic symptoms                                        | 1281                  | Logistic          | 1,15                  | 1,03 , 1,29     | <b>1,40E-02</b> |
| Sleeping disturbances                                     | 1228                  | Logistic          | 0,93                  | 0,83 , 1,04     | 0,21            |

## Sociodemographic and health phenotypes

### *EuropASI*

|                                          |      |                   |       |              |                 |
|------------------------------------------|------|-------------------|-------|--------------|-----------------|
| Legal status                             | 984  | Ordinal           | 1,06  | 0,92 , 1,23  | 0,42            |
| Employment status                        | 984  | Ordinal           | 1,10  | 0,99 , 1,23  | 0,08            |
| Medical status                           | 982  | Ordinal           | 1,02  | 0,9 , 1,16   | 0,71            |
| Psychiatric status                       | 984  | Ordinal           | 1,03  | 0,92 , 1,15  | 0,60            |
| Drug use                                 | 984  | Ordinal           | 0,96  | 0,86 , 1,08  | 0,48            |
| Alcohol use                              | 984  | Ordinal           | 1,03  | 0,92 , 1,16  | 0,61            |
| Family/Social relationships              | 981  | Ordinal           | 1,01  | 0,91 , 1,13  | 0,82            |
| <i>36-Item Short Form Survey (SF-36)</i> |      |                   |       |              |                 |
| Physical health                          | 751  | Linear            | -0,53 | -1,26 , 0,21 | 0,16            |
| Mental health                            | 751  | Linear            | -0,10 | -1,08 , 0,89 | 0,85            |
| Criminal record                          | 713  | Logistic          | 1,07  | 0,92 , 1,24  | 0,41            |
| Unemployment                             | 1057 | Logistic          | 1,13  | 1 , 1,28     | <b>4,71E-02</b> |
| Number of psychiatric hospitalizations   | 760  | Negative binomial | 1,10  | 0,9 , 1,34   | 0,35            |
| Psychiatric family history               | 840  | Logistic          | 1,01  | 0,88 , 1,15  | 0,93            |
| Lifetime medical conditions              | 1334 | Logistic          | 0,99  | 0,88 , 1,11  | 0,86            |
| Substance use family history             | 818  | Logistic          | 1,03  | 0,9 , 1,19   | 0,64            |
| Educational attainment                   | 1333 | Ordinal           | 1,01  | 1,11 , 0,91  | 0,87            |

<sup>a</sup> For binary traits sample size was calculated with the formula  $4/(1/n1+1/n2)$

<sup>b</sup> OR is reported for logistic regression and ordinal regression; Beta is reported for lineal regression; IRR is reported for negative binomial regression

<sup>c</sup> Logarithmic transformations were applied to continuous variables not following a normal distribution

**Supplementary Table 2g.** Association between the GPS for risk tolerance and 39 clinical variables from the SUD phenome. In bold nominal significant results.

| Phenotypes                                                | <i>n</i> <sup>a</sup> | Regression        | Estimate <sup>b</sup> | 95% CI           | <i>p</i>        |
|-----------------------------------------------------------|-----------------------|-------------------|-----------------------|------------------|-----------------|
| <b>SUD-related phenotypes</b>                             |                       |                   |                       |                  |                 |
| Age at onset of substance use <sup>c</sup>                | 1308                  | Linear            | -0,01                 | -0,02 , 3,00E-03 | 0,12            |
| Age at onset of SUD <sup>c</sup>                          | 1280                  | Linear            | -0,01                 | -0,03 , 4,00E-03 | 0,14            |
| Years between substance use and SUD                       | 1280                  | Linear            | 0,99                  | 0,9 , 1,08       | 0,77            |
| Years of substance use as proportion of lifespan          | 1199                  | Linear            | 0,42                  | -0,63 , 1,47     | 0,43            |
| Number of substances consumed                             | 879                   | Negative binomial | 1,02                  | 0,98 , 1,06      | 0,31            |
| Number of therapeutic community interventions             | 1345                  | Negative binomial | 1,02                  | 0,93 , 1,12      | 0,69            |
| Number of inpatient detoxifications                       | 1327                  | Negative binomial | 1,01                  | 0,9 , 1,13       | 0,88            |
| Number of outpatient treatments                           | 1252                  | Negative binomial | 1,06                  | 1 , 1,12         | <b>4,33E-02</b> |
| <b>Comorbidity and personality traits</b>                 |                       |                   |                       |                  |                 |
| <i>Mental disorders in DSM-IV</i>                         |                       |                   |                       |                  |                 |
| Borderline personality disorder                           | 447                   | Logistic          | 0,97                  | 0,8 , 1,18       | 0,76            |
| Major depressive disorder                                 | 828                   | Logistic          | 0,89                  | 0,77 , 1,02      | 0,09            |
| Antisocial personality disorder                           | 560                   | Logistic          | 0,99                  | 0,83 , 1,17      | 0,87            |
| Psychotic disorder                                        | 593                   | Logistic          | 1,08                  | 0,84 , 1,38      | 0,55            |
| Anxiety disorder                                          | 654                   | Logistic          | 1,03                  | 0,89 , 1,21      | 0,69            |
| Attention deficit hyperactivity disorder                  | 700                   | Logistic          | 1,08                  | 0,93 , 1,26      | 0,30            |
| <i>Zuckerman–Kuhlman Personality Questionnaire (ZKPQ)</i> |                       |                   |                       |                  |                 |
| Neuroticism Anxiety personality factor                    | 663                   | Linear            | -0,51                 | -0,88 , -0,14    | <b>6,90E-03</b> |
| Aggression Hostility personality factor                   | 667                   | Linear            | 0,17                  | -0,07 , 0,41     | 0,16            |
| Sociability personality factor                            | 632                   | Linear            | 0,09                  | -0,18 , 0,36     | 0,51            |
| Impulsive sensation seeking personality factor            | 666                   | Linear            | 0,32                  | 0 , 0,65         | <b>4,98E-02</b> |
| Activity personality factor                               | 665                   | Linear            | 0,10                  | -0,17 , 0,36     | 0,48            |
| Suicide attempt                                           | 618                   | Logistic          | 1,11                  | 0,95 , 1,29      | 0,18            |
| Suicide ideation                                          | 731                   | Logistic          | 1,04                  | 0,88 , 1,23      | 0,62            |
| Psychotic symptoms                                        | 1281                  | Logistic          | 1,00                  | 0,89 , 1,12      | 0,98            |
| Sleeping disturbances                                     | 1228                  | Logistic          | 1,09                  | 0,97 , 1,22      | 0,16            |

## Sociodemographic and health phenotypes

### *EuropASI*

|                                          |      |                   |      |              |                 |
|------------------------------------------|------|-------------------|------|--------------|-----------------|
| Legal status                             | 984  | Ordinal           | 1,18 | 1,02 , 1,36  | <b>2,29E-02</b> |
| Employment status                        | 984  | Ordinal           | 0,95 | 0,85 , 1,06  | 0,35            |
| Medical status                           | 982  | Ordinal           | 1,03 | 0,91 , 1,16  | 0,64            |
| Psychiatric status                       | 984  | Ordinal           | 0,97 | 0,87 , 1,08  | 0,59            |
| Drug use                                 | 984  | Ordinal           | 1,01 | 0,91 , 1,13  | 0,84            |
| Alcohol use                              | 984  | Ordinal           | 1,03 | 0,92 , 1,15  | 0,58            |
| Family/Social relationships              | 981  | Ordinal           | 1,01 | 0,9 , 1,12   | 0,92            |
| <i>36-Item Short Form Survey (SF-36)</i> |      |                   |      |              |                 |
| Physical health                          | 751  | Linear            | 0,08 | -0,65 , 0,81 | 0,83            |
| Mental health                            | 751  | Linear            | 0,30 | -0,67 , 1,27 | 0,55            |
| Criminal record                          | 713  | Logistic          | 1,16 | 1 , 1,36     | 0,06            |
| Unemployment                             | 1057 | Logistic          | 0,99 | 0,87 , 1,11  | 0,83            |
| Number of psychiatric hospitalizations   | 760  | Negative binomial | 0,87 | 0,71 , 1,07  | 0,18            |
| Psychiatric family history               | 840  | Logistic          | 1,01 | 0,88 , 1,17  | 0,84            |
| Lifetime medical conditions              | 1334 | Logistic          | 1,05 | 0,94 , 1,18  | 0,37            |
| Substance use family history             | 818  | Logistic          | 1,11 | 0,96 , 1,28  | 0,15            |
| Educational attainment                   | 1333 | Ordinal           | 1,04 | 1,15 , 0,94  | 0,42            |

<sup>a</sup> For binary traits sample size was calculated with the formula  $4/(1/n1+1/n2)$

<sup>b</sup> OR is reported for logistic regression and ordinal regression; Beta is reported for lineal regression; IRR is reported for negative binomial regression

<sup>c</sup> Logarithmic transformations were applied to continuous variables not following a normal distribution

**Supplementary Table 2h.** Association between the GPS for suicide attempt and 39 clinical variables from the SUD phenome. In bold nominal significant results.

| Phenotypes                                                | <i>n</i> <sup>a</sup> | Regression        | Estimate <sup>b</sup> | 95% CI           | <i>p</i>        |
|-----------------------------------------------------------|-----------------------|-------------------|-----------------------|------------------|-----------------|
| <b>SUD-related phenotypes</b>                             |                       |                   |                       |                  |                 |
| Age at onset of substance use <sup>c</sup>                | 1308                  | Linear            | -0,01                 | -0,03 , 2,00E-03 | 0,11            |
| Age at onset of SUD <sup>c</sup>                          | 1280                  | Linear            | -0,02                 | -0,04 , -0,01    | <b>1,12E-02</b> |
| Years between substance use and SUD                       | 1280                  | Linear            | 0,92                  | 0,84 , 1,01      | 0,08            |
| Years of substance use as proportion of lifespan          | 1199                  | Linear            | 0,03                  | -1,04 , 1,09     | 0,96            |
| Number of substances consumed                             | 879                   | Negative binomial | 1,00                  | 0,96 , 1,05      | 0,85            |
| Number of therapeutic community interventions             | 1345                  | Negative binomial | 0,96                  | 0,87 , 1,06      | 0,40            |
| Number of inpatient detoxifications                       | 1327                  | Negative binomial | 1,02                  | 0,9 , 1,14       | 0,79            |
| Number of outpatient treatments                           | 1252                  | Negative binomial | 1,06                  | 1 , 1,12         | <b>4,10E-02</b> |
| <b>Comorbidity and personality traits</b>                 |                       |                   |                       |                  |                 |
| <i>Mental disorders in DSM-IV</i>                         |                       |                   |                       |                  |                 |
| Borderline personality disorder                           | 447                   | Logistic          | 1,10                  | 0,9 , 1,35       | 0,34            |
| Major depressive disorder                                 | 828                   | Logistic          | 1,08                  | 0,93 , 1,25      | 0,33            |
| Antisocial personality disorder                           | 560                   | Logistic          | 1,18                  | 0,99 , 1,4       | 0,07            |
| Psychotic disorder                                        | 593                   | Logistic          | 1,09                  | 0,85 , 1,42      | 0,50            |
| Anxiety disorder                                          | 654                   | Logistic          | 1,03                  | 0,88 , 1,21      | 0,69            |
| Attention deficit hyperactivity disorder                  | 700                   | Logistic          | 1,09                  | 0,93 , 1,27      | 0,30            |
| <i>Zuckerman–Kuhlman Personality Questionnaire (ZKPQ)</i> |                       |                   |                       |                  |                 |
| Neuroticism Anxiety personality factor                    | 663                   | Linear            | 0,09                  | -0,29 , 0,48     | 0,63            |
| Aggression Hostility personality factor                   | 667                   | Linear            | 0,26                  | 0,02 , 0,51      | <b>3,60E-02</b> |
| Sociability personality factor                            | 632                   | Linear            | 0,04                  | -0,24 , 0,31     | 0,80            |
| Impulsive sensation seeking personality factor            | 666                   | Linear            | 0,00                  | -0,33 , 0,34     | 0,99            |
| Activity personality factor                               | 665                   | Linear            | 0,24                  | -0,03 , 0,52     | 0,09            |
| Suicide attempt                                           | 618                   | Logistic          | 1,01                  | 0,87 , 1,18      | 0,85            |
| Suicide ideation                                          | 731                   | Logistic          | 1,16                  | 0,98 , 1,37      | 0,08            |
| Psychotic symptoms                                        | 1281                  | Logistic          | 1,15                  | 1,03 , 1,29      | <b>1,69E-02</b> |
| Sleeping disturbances                                     | 1228                  | Logistic          | 0,97                  | 0,87 , 1,09      | 0,65            |



## Sociodemographic and health phenotypes

### *EuropASI*

|                                          |      |                   |       |              |                 |
|------------------------------------------|------|-------------------|-------|--------------|-----------------|
| Legal status                             | 984  | Ordinal           | 1,18  | 1,01 , 1,37  | <b>3,27E-02</b> |
| Employment status                        | 984  | Ordinal           | 1,03  | 0,92 , 1,16  | 0,56            |
| Medical status                           | 982  | Ordinal           | 1,14  | 1 , 1,29     | <b>4,93E-02</b> |
| Psychiatric status                       | 984  | Ordinal           | 1,13  | 1,01 , 1,27  | <b>3,88E-02</b> |
| Drug use                                 | 984  | Ordinal           | 1,05  | 0,93 , 1,18  | 0,44            |
| Alcohol use                              | 984  | Ordinal           | 1,02  | 0,91 , 1,15  | 0,75            |
| Family/Social relationships              | 981  | Ordinal           | 1,13  | 1 , 1,26     | 0,05            |
| <i>36-Item Short Form Survey (SF-36)</i> |      |                   |       |              |                 |
| Physical health                          | 751  | Linear            | -0,47 | -1,21 , 0,27 | 0,22            |
| Mental health                            | 751  | Linear            | -0,19 | -1,18 , 0,8  | 0,71            |
| Criminal record                          | 713  | Logistic          | 1,14  | 0,98 , 1,32  | 0,11            |
| Unemployment                             | 1057 | Logistic          | 1,05  | 0,93 , 1,19  | 0,40            |
| Number of psychiatric hospitalizations   | 760  | Negative binomial | 1,08  | 0,88 , 1,32  | 0,47            |
| Psychiatric family history               | 840  | Logistic          | 0,94  | 0,82 , 1,08  | 0,40            |
| Lifetime medical conditions              | 1334 | Logistic          | 1,13  | 1,01 , 1,27  | <b>3,84E-02</b> |
| Substance use family history             | 818  | Logistic          | 1,11  | 0,96 , 1,28  | 0,15            |
| Educational attainment                   | 1333 | Ordinal           | 0,90  | 1 , 0,81     | <b>4,30E-02</b> |

<sup>a</sup> For binary traits sample size was calculated with the formula  $4/(1/n1+1/n2)$

<sup>b</sup> OR is reported for logistic regression and ordinal regression; Beta is reported for lineal regression; IRR is reported for negative binomial regression

<sup>c</sup> Logarithmic transformations were applied to continuous variables not following a normal distribution

**Supplementary Table 2i.** Association between the GPS for educational attainment and 39 clinical variables from the SUD phenome. In bold nominal significant results.

| Phenotypes                                                | <i>n</i> <sup>a</sup> | Regression        | Estimate <sup>b</sup> | 95% CI          | <i>p</i>        |
|-----------------------------------------------------------|-----------------------|-------------------|-----------------------|-----------------|-----------------|
| <b>SUD-related phenotypes</b>                             |                       |                   |                       |                 |                 |
| Age at onset of substance use <sup>c</sup>                | 1308                  | Linear            | 0,02                  | 0,01 , 0,03     | <b>8,11E-03</b> |
| Age at onset of SUD <sup>c</sup>                          | 1280                  | Linear            | 0,02                  | 4,00E-03 , 0,04 | <b>1,48E-02</b> |
| Years between substance use and SUD                       | 1280                  | Linear            | 1,07                  | 0,98 , 1,17     | 0,15            |
| Years of substance use as proportion of lifespan          | 1199                  | Linear            | -0,73                 | -1,77 , 0,31    | 0,17            |
| Number of substances consumed                             | 879                   | Negative binomial | 1,00                  | 0,96 , 1,04     | 0,89            |
| Number of therapeutic community interventions             | 1345                  | Negative binomial | 0,89                  | 0,81 , 0,98     | <b>2,28E-02</b> |
| Number of inpatient detoxifications                       | 1327                  | Negative binomial | 0,89                  | 0,8 , 1         | 0,06            |
| Number of outpatient treatments                           | 1252                  | Negative binomial | 0,91                  | 0,87 , 0,97     | <b>1,64E-03</b> |
| <b>Comorbidity and personality traits</b>                 |                       |                   |                       |                 |                 |
| <i>Mental disorders in DSM-IV</i>                         |                       |                   |                       |                 |                 |
| Borderline personality disorder                           | 447                   | Logistic          | 0,96                  | 0,79 , 1,18     | 0,70            |
| Major depressive disorder                                 | 828                   | Logistic          | 0,91                  | 0,79 , 1,06     | 0,24            |
| Antisocial personality disorder                           | 560                   | Logistic          | 0,90                  | 0,75 , 1,08     | 0,24            |
| Psychotic disorder                                        | 593                   | Logistic          | 1,04                  | 0,8 , 1,37      | 0,76            |
| Anxiety disorder                                          | 654                   | Logistic          | 0,97                  | 0,83 , 1,14     | 0,71            |
| Attention deficit hyperactivity disorder                  | 700                   | Logistic          | 0,89                  | 0,76 , 1,05     | 0,16            |
| <i>Zuckerman–Kuhlman Personality Questionnaire (ZKPQ)</i> |                       |                   |                       |                 |                 |
| Neuroticism Anxiety personality factor                    | 663                   | Linear            | -0,39                 | -0,78 , -0,01   | <b>4,50E-02</b> |
| Aggression Hostility personality factor                   | 667                   | Linear            | -0,18                 | -0,42 , 0,07    | 0,16            |
| Sociability personality factor                            | 632                   | Linear            | 0,10                  | -0,18 , 0,38    | 0,47            |
| Impulsive sensation seeking personality factor            | 666                   | Linear            | -0,05                 | -0,39 , 0,28    | 0,75            |
| Activity personality factor                               | 665                   | Linear            | 0,17                  | -0,11 , 0,45    | 0,24            |
| Suicide attempt                                           | 618                   | Logistic          | 1,03                  | 0,89 , 1,2      | 0,66            |
| Suicide ideation                                          | 731                   | Logistic          | 1,00                  | 0,85 , 1,17     | 0,96            |
| Psychotic symptoms                                        | 1281                  | Logistic          | 0,91                  | 0,82 , 1,02     | 0,12            |
| Sleeping disturbances                                     | 1228                  | Logistic          | 0,91                  | 0,81 , 1,02     | 0,09            |

## Sociodemographic and health phenotypes

### *EuropASI*

|                                          |      |                   |      |              |                 |
|------------------------------------------|------|-------------------|------|--------------|-----------------|
| Legal status                             | 984  | Ordinal           | 0,96 | 0,82 , 1,11  | 0,55            |
| Employment status                        | 984  | Ordinal           | 0,90 | 0,81 , 1,01  | 0,07            |
| Medical status                           | 982  | Ordinal           | 1,00 | 0,88 , 1,13  | 0,99            |
| Psychiatric status                       | 984  | Ordinal           | 0,91 | 0,81 , 1,01  | 0,08            |
| Drug use                                 | 984  | Ordinal           | 0,95 | 0,84 , 1,06  | 0,36            |
| Alcohol use                              | 984  | Ordinal           | 0,98 | 0,87 , 1,1   | 0,75            |
| Family/Social relationships              | 981  | Ordinal           | 0,86 | 0,77 , 0,96  | <b>1,00E-02</b> |
| <i>36-Item Short Form Survey (SF-36)</i> |      |                   |      |              |                 |
| Physical health                          | 751  | Linear            | 0,53 | -0,24 , 1,3  | 0,18            |
| Mental health                            | 751  | Linear            | 0,59 | -0,43 , 1,62 | 0,26            |
| Criminal record                          | 713  | Logistic          | 0,67 | 0,57 , 0,78  | <b>8,03E-07</b> |
| Unemployment                             | 1057 | Logistic          | 0,82 | 0,72 , 0,92  | <b>1,34E-03</b> |
| Number of psychiatric hospitalizations   | 760  | Negative binomial | 1,15 | 0,94 , 1,41  | 0,17            |
| Psychiatric family history               | 840  | Logistic          | 1,08 | 0,94 , 1,23  | 0,28            |
| Lifetime medical conditions              | 1334 | Logistic          | 0,99 | 0,88 , 1,11  | 0,88            |
| Substance use family history             | 818  | Logistic          | 0,80 | 0,7 , 0,92   | <b>2,20E-03</b> |
| Educational attainment                   | 1333 | Ordinal           | 1,39 | 1,54 , 1,25  | <b>3,34E-10</b> |

<sup>a</sup> For binary traits sample size was calculated with the formula  $4/(1/n1+1/n2)$

<sup>b</sup> OR is reported for logistic regression and ordinal regression; Beta is reported for lineal regression; IRR is reported for negative binomial regression

<sup>c</sup> Logarithmic transformations were applied to continuous variables not following a normal distribution

**Supplementary Table 2j.** Association between the GPS for well-being and 39 clinical variables from the SUD phenome. In bold nominal significant results.

| Phenotypes                                                | <i>n</i> <sup>a</sup> | Regression        | Estimate <sup>b</sup> | 95% CI           | <i>p</i>        |
|-----------------------------------------------------------|-----------------------|-------------------|-----------------------|------------------|-----------------|
| <b>SUD-related phenotypes</b>                             |                       |                   |                       |                  |                 |
| Age at onset of substance use <sup>c</sup>                | 1308                  | Linear            | -0,01                 | -0,02 , 3,00E-03 | 0,13            |
| Age at onset of SUD <sup>c</sup>                          | 1280                  | Linear            | -0,01                 | -0,03 , 0,01     | 0,25            |
| Years between substance use and SUD                       | 1280                  | Linear            | 0,98                  | 0,9 , 1,07       | 0,69            |
| Years of substance use as proportion of lifespan          | 1199                  | Linear            | 0,65                  | -0,4 , 1,7       | 0,23            |
| Number of substances consumed                             | 879                   | Negative binomial | 0,99                  | 0,95 , 1,04      | 0,81            |
| Number of therapeutic community interventions             | 1345                  | Negative binomial | 0,99                  | 0,9 , 1,08       | 0,77            |
| Number of inpatient detoxifications                       | 1327                  | Negative binomial | 0,99                  | 0,88 , 1,11      | 0,87            |
| Number of outpatient treatments                           | 1252                  | Negative binomial | 0,91                  | 0,86 , 0,96      | <b>7,00E-04</b> |
| <b>Comorbidity and personality traits</b>                 |                       |                   |                       |                  |                 |
| <i>Mental disorders in DSM-IV</i>                         |                       |                   |                       |                  |                 |
| Borderline personality disorder                           | 447                   | Logistic          | 1,07                  | 0,87 , 1,31      | 0,52            |
| Major depressive disorder                                 | 828                   | Logistic          | 0,99                  | 0,86 , 1,15      | 0,90            |
| Antisocial personality disorder                           | 560                   | Logistic          | 1,06                  | 0,9 , 1,26       | 0,49            |
| Psychotic disorder                                        | 593                   | Logistic          | 0,85                  | 0,65 , 1,11      | 0,23            |
| Anxiety disorder                                          | 654                   | Logistic          | 0,90                  | 0,76 , 1,06      | 0,20            |
| Attention deficit hyperactivity disorder                  | 700                   | Logistic          | 0,92                  | 0,79 , 1,07      | 0,28            |
| <i>Zuckerman–Kuhlman Personality Questionnaire (ZKPQ)</i> |                       |                   |                       |                  |                 |
| Neuroticism Anxiety personality factor                    | 663                   | Linear            | -0,34                 | -0,72 , 0,04     | 0,08            |
| Aggression Hostility personality factor                   | 667                   | Linear            | 0,05                  | -0,2 , 0,29      | 0,71            |
| Sociability personality factor                            | 632                   | Linear            | 0,27                  | -0,01 , 0,54     | 0,06            |
| Impulsive sensation seeking personality factor            | 666                   | Linear            | 0,25                  | -0,08 , 0,58     | 0,14            |
| Activity personality factor                               | 665                   | Linear            | 0,11                  | -0,16 , 0,38     | 0,43            |
| Suicide attempt                                           | 618                   | Logistic          | 0,95                  | 0,82 , 1,1       | 0,50            |
| Suicide ideation                                          | 731                   | Logistic          | 0,93                  | 0,79 , 1,09      | 0,36            |
| Psychotic symptoms                                        | 1281                  | Logistic          | 0,93                  | 0,83 , 1,04      | 0,20            |
| Sleeping disturbances                                     | 1228                  | Logistic          | 0,91                  | 0,82 , 1,02      | 0,12            |

## Sociodemographic and health phenotypes

### *EuropASI*

|                                          |      |                   |      |              |                 |
|------------------------------------------|------|-------------------|------|--------------|-----------------|
| Legal status                             | 984  | Ordinal           | 0,95 | 0,82 , 1,1   | 0,51            |
| Employment status                        | 984  | Ordinal           | 0,95 | 0,85 , 1,06  | 0,37            |
| Medical status                           | 982  | Ordinal           | 0,95 | 0,83 , 1,07  | 0,40            |
| Psychiatric status                       | 984  | Ordinal           | 0,87 | 0,78 , 0,97  | <b>1,43E-02</b> |
| Drug use                                 | 984  | Ordinal           | 0,98 | 0,87 , 1,09  | 0,67            |
| Alcohol use                              | 984  | Ordinal           | 1,01 | 0,9 , 1,14   | 0,83            |
| Family/Social relationships              | 981  | Ordinal           | 0,83 | 0,74 , 0,93  | <b>1,00E-03</b> |
| <i>36-Item Short Form Survey (SF-36)</i> |      |                   |      |              |                 |
| Physical health                          | 751  | Linear            | 0,64 | -0,1 , 1,37  | 0,09            |
| Mental health                            | 751  | Linear            | 0,51 | -0,47 , 1,49 | 0,31            |
| Criminal record                          | 713  | Logistic          | 0,90 | 0,78 , 1,05  | 0,17            |
| Unemployment                             | 1057 | Logistic          | 0,88 | 0,77 , 0,99  | <b>3,59E-02</b> |
| Number of psychiatric hospitalizations   | 760  | Negative binomial | 0,78 | 0,64 , 0,95  | <b>1,33E-02</b> |
| Psychiatric family history               | 840  | Logistic          | 0,90 | 0,79 , 1,03  | 0,13            |
| Lifetime medical conditions              | 1334 | Logistic          | 0,98 | 0,87 , 1,1   | 0,70            |
| Substance use family history             | 818  | Logistic          | 0,83 | 0,73 , 0,96  | <b>1,13E-02</b> |
| Educational attainment                   | 1333 | Ordinal           | 1,06 | 1,18 , 0,96  | 0,23            |

<sup>a</sup> For binary traits sample size was calculated with the formula  $4/(1/n1+1/n2)$

<sup>b</sup> OR is reported for logistic regression and ordinal regression; Beta is reported for lineal regression; IRR is reported for negative binomial regression

<sup>c</sup> Logarithmic transformations were applied to continuous variables not following a normal distribution

**Supplementary Table 3.**

*Interaction between GPSs and lifetime emotional, physical and/or sexual abuse in the SUD phenome*

| <b>GPS</b>                               | <b>SUD-Phenome</b>                               | <b><i>n</i><sup>a</sup></b> | <b>Estimate</b> | <b>95% CI</b> | <b><i>p</i></b> |
|------------------------------------------|--------------------------------------------------|-----------------------------|-----------------|---------------|-----------------|
| Attention-deficit hyperactivity disorder | Age at onset of substance use <sup>b</sup>       | 701                         | -.002           | -.04 , .04    | .94             |
|                                          | Years of substance use as proportion of lifespan | 631                         | .32             | -2.57 , 3.2   | .83             |
|                                          | Antisocial personality disorder                  | 358                         | 1.00            | .66 , 1.51    | .99             |
|                                          | Attention deficit hyperactivity disorder         | 434                         | .94             | .63 , 1.4     | .77             |
|                                          | Educational attainment                           | 701                         | .96             | .73 , 1.26    | .77             |
| Anxiety                                  | Number of outpatient treatments                  | 681                         | 1.06            | .92 , 1.22    | .42             |
|                                          | Psychotic disorder                               | 180                         | 1.10            | .61 , 1.99    | .76             |
|                                          | SF36 Physical health                             | 509                         | .43             | -1.27 , 2.12  | .62             |
|                                          | Psychiatric family history                       | 524                         | 1.03            | .73 , 1.46    | .86             |
| Bipolar disorder                         | Psychotic symptoms                               | 678                         | 1.01            | .74 , 1.39    | .93             |
|                                          | Unemployment                                     | 568                         | 1.08            | .78 , 1.51    | .64             |
|                                          | Number of psychiatric hospitalizations           | 504                         | .87             | .53 , 1.42    | .57             |
|                                          | Substance use family history                     | 516                         | .98             | .69 , 1.39    | .91             |
| Depression                               | Years between substance use and SUD              | 691                         | .96             | .74 , 1.25    | .78             |
|                                          | Number of outpatient treatments                  | 681                         | 1.07            | .92 , 1.23    | .39             |
|                                          | ZKPQ-Neuroticism Anxiety personality factor      | 492                         | .20             | -.64 , 1.05   | .64             |
|                                          | ZKPQ-Aggression Hostility personality factor     | 495                         | -.28            | -.83 , .26    | .31             |

|                                |                                                     |     |      |             |     |
|--------------------------------|-----------------------------------------------------|-----|------|-------------|-----|
|                                | Suicide attempt                                     | 725 | .93  | .69 , 1.26  | .65 |
|                                | Criminal record                                     | 488 | .76  | .53 , 1.1   | .14 |
|                                | Psychiatric family history                          | 524 | 1.31 | .92 , 1.86  | .13 |
| Post-traumatic stress disorder | Age at onset of substance use <sup>b</sup>          | 701 | -.02 | -.06 , .03  | .45 |
|                                | Number of inpatient detoxifications                 | 702 | .91  | .65 , 1.26  | .56 |
|                                | Unemployment                                        | 568 | .85  | .6 , 1.21   | .38 |
|                                | Educational attainment                              | 701 | 1.08 | .81 , 1.44  | .58 |
| Schizophrenia                  | Age at onset of substance use <sup>b</sup>          | 701 | .03  | -.01 , .08  | .11 |
|                                | Psychotic disorder                                  | 180 | .85  | .45 , 1.59  | .60 |
|                                | Psychotic symptoms                                  | 678 | .97  | .7 , 1.33   | .83 |
|                                | Unemployment                                        | 568 | .76  | .54 , 1.07  | .12 |
| Risk tolerance                 | Number of outpatient treatments                     | 681 | 1.12 | .96 , 1.31  | .14 |
|                                | ZKPQ-Neuroticism Anxiety personality factor         | 492 | .29  | -.6 , 1.18  | .53 |
|                                | ZKPQ-Impulsive sensation seeking personality factor | 493 | .39  | -.37 , 1.14 | .32 |
|                                | EuropASI-Legal status                               | 701 | 1.07 | .75 , 1.52  | .72 |
|                                | Unemployment                                        | 568 | .85  | .6 , 1.21   | .38 |
| Suicide attempt                | Age at onset of SUD <sup>b</sup>                    | 699 | .00  | -.04 , .05  | .89 |
|                                | Number of outpatient treatments                     | 681 | .98  | .84 , 1.13  | .77 |
|                                | ZKPQ-Aggression Hostility personality factor        | 495 | -.02 | -.58 , .55  | .96 |
|                                | Psychotic symptoms                                  | 678 | 1.03 | .75 , 1.41  | .86 |
|                                | EuropASI-Legal status                               | 701 | 1.08 | .76 , 1.55  | .66 |

|                        |                                               |     |      |             |                 |
|------------------------|-----------------------------------------------|-----|------|-------------|-----------------|
|                        | EuropASI-Medical status                       | 699 | 1.13 | .84 , 1.51  | .41             |
|                        | EuropASI-Psychiatric status                   | 701 | 1.35 | 1.03 , 1.78 | <b>2.94E-02</b> |
|                        | Lifetime medical conditions                   | 705 | .95  | .7 , 1.31   | .76             |
|                        | Educational attainment                        | 701 | 1.10 | .83 , 1.46  | .51             |
| Educational attainment | Age at onset of substance use <sup>b</sup>    | 701 | .01  | -.03 , .06  | .50             |
|                        | Age at onset of SUD <sup>b</sup>              | 699 | .01  | -.03 , .06  | .54             |
|                        | Number of therapeutic community interventions | 698 | .86  | .67 , 1.11  | .26             |
|                        | Number of outpatient treatments               | 681 | 1.06 | .91 , 1.23  | .47             |
|                        | ZKPQ-Neuroticism Anxiety personality factor   | 492 | .16  | -.73 , 1.06 | .72             |
|                        | Criminal record                               | 488 | 1.27 | .86 , 1.89  | .23             |
|                        | Unemployment                                  | 568 | .73  | .51 , 1.04  | .08             |
|                        | Substance use family history                  | 516 | 1.00 | .7 , 1.45   | .99             |
|                        | Educational attainment                        | 701 | .94  | .71 , 1.26  | .69             |
| Well being             | Number of outpatient treatments               | 681 | 1.00 | .86 , 1.17  | .97             |
|                        | EuropASI- Psychiatric status                  | 701 | 1.01 | .77 , 1.32  | .96             |
|                        | EuropASI-Family/social relationships          | 701 | .95  | .73 , 1.25  | .22             |
|                        | Unemployment                                  | 568 | .87  | .61 , 1.25  | .46             |
|                        | Number of psychiatric hospitalizations        | 504 | 1.23 | .73 , 2.07  | .44             |
|                        | Substance use family history                  | 516 | 1.05 | .73 , 1.52  | .80             |

Note. Odds Ratio (OR) is reported for logistic regression and ordinal regression; Beta is reported for lineal regression; Incidence Rate Ratio (IRR) is reported for negative binomial regression.

<sup>a</sup> For binary traits sample size was calculated with the formula  $4/(1/n1+1/n2)$ .

<sup>b</sup> Logarithmic transformations were applied to continuous variables not following a normal distribution.



## References

1. Demontis D, Walters RK, Martin J, Mattheisen M, Als TD, Agerbo E, et al. Discovery of the first genome-wide significant risk loci for attention deficit/hyperactivity disorder. *Nat Genet.* 2019;51:63–75.
2. Mullins N, Forstner AJ, O'Connell KS, Coombes B, Coleman JRI, Qiao Z, et al. Genome-wide association study of more than 40,000 bipolar disorder cases provides new insights into the underlying biology. *Nat Genet.* 2021;53:817–829.
3. Howard DM, Adams MJ, Clarke TK, Hafferty JD, Gibson J, Shiri M, et al. Genome-wide meta-analysis of depression identifies 102 independent variants and highlights the importance of the prefrontal brain regions. *Nat Neurosci.* 2019;22:343–352.
4. Nievergelt CM, Maihofer AX, Klengel T, Atkinson EG, Chen CY, Choi KW, et al. International meta-analysis of PTSD genome-wide association studies identifies sex- and ancestry-specific genetic risk loci. *Nat Commun.* 2019;10.
5. Trubetskoy V, Pardiñas AF, Qi T, Panagiotaropoulou G, Awasthi S, Bigdeli TB, et al. Mapping genomic loci implicates genes and synaptic biology in schizophrenia. *Nature.* 2022;604:502.
6. Karlsson Linnér R, Biroli P, Kong E, Meddens SFW, Wedow R, Fontana MA, et al. Genome-wide association analyses of risk tolerance and risky behaviors in over 1 million individuals identify hundreds of loci and shared genetic influences. *Nat Genet.* 2019;51:245–257.
7. Docherty AR, Mullins N, Ashley-Koch AE, Qin XJ, Coleman J, Shabalín AA, et al. Genome-wide association study meta-analysis of suicide attempt in 43,871 cases identifies twelve genome-wide significant loci. *MedRxiv.* 2022. 2022. <https://doi.org/10.1101/2022.07.03.22277199>.
8. Lee JJ, Wedow R, Okbay A, Kong E, Maghzián O, Zacher M, et al. Gene discovery and polygenic prediction from a genome-wide association study of educational attainment in 1.1 million individuals. *Nat Genet.* 2018;50:1112–1121.
9. Baselmans BML, Jansen R, Ip HF, van Dongen J, Abdellaoui A, van de Weijer MP, et al. Multivariate genome-wide analyses of the well-being spectrum. *Nat Genet.* 2019;51:445–451.
